# Supplementary material for: Three-dimensional graphene oxide: a promising green and sustainable catalyst for oxidation reactions at room temperature
Source: Royal Society of Chemistry journal article supplement (doi:10.1039/c4cc02092h), 2014-01-01
Supplement: c4cc02092h1.pdf [file c4cc02092h1.pdf]

## SUPPLEMENTARY INFORMATION (S.I.)

### Three-dimensional graphene oxide: A promising green and sustainable catalyst for oxidation reactions at room temperature

Gil A.B. Gonçalves, Sónia M.G. Pires, Mário M.Q. Simões, M. Graça P.M.S. Neves and Paula A.A.P. Marques

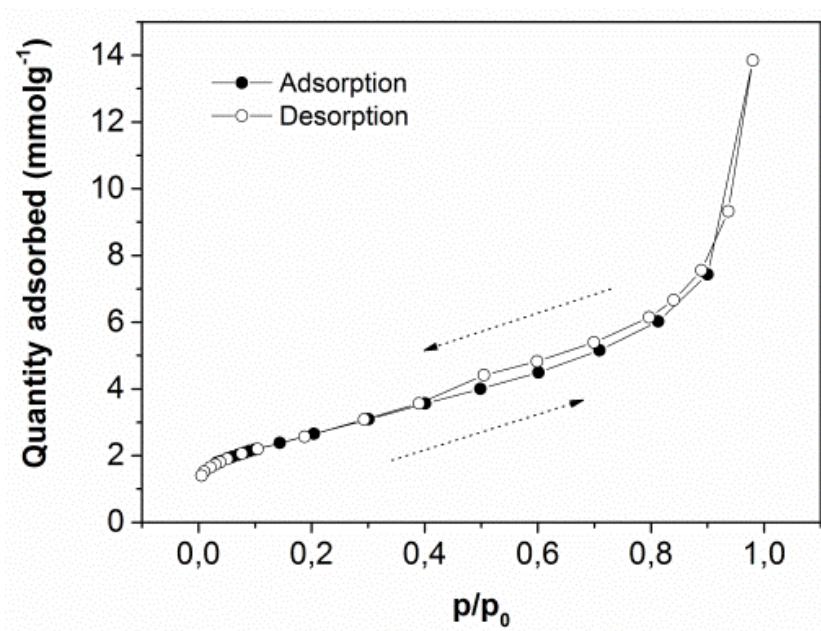

**Fig. S1** Nitrogen adsorption-desorption isotherm of 3DGO.

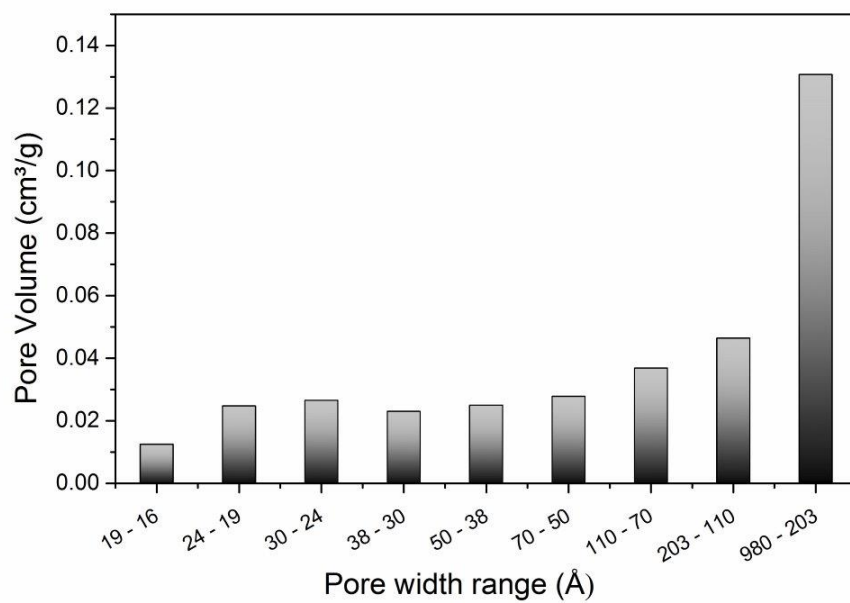

**Fig. S2** Pore width range distribution.

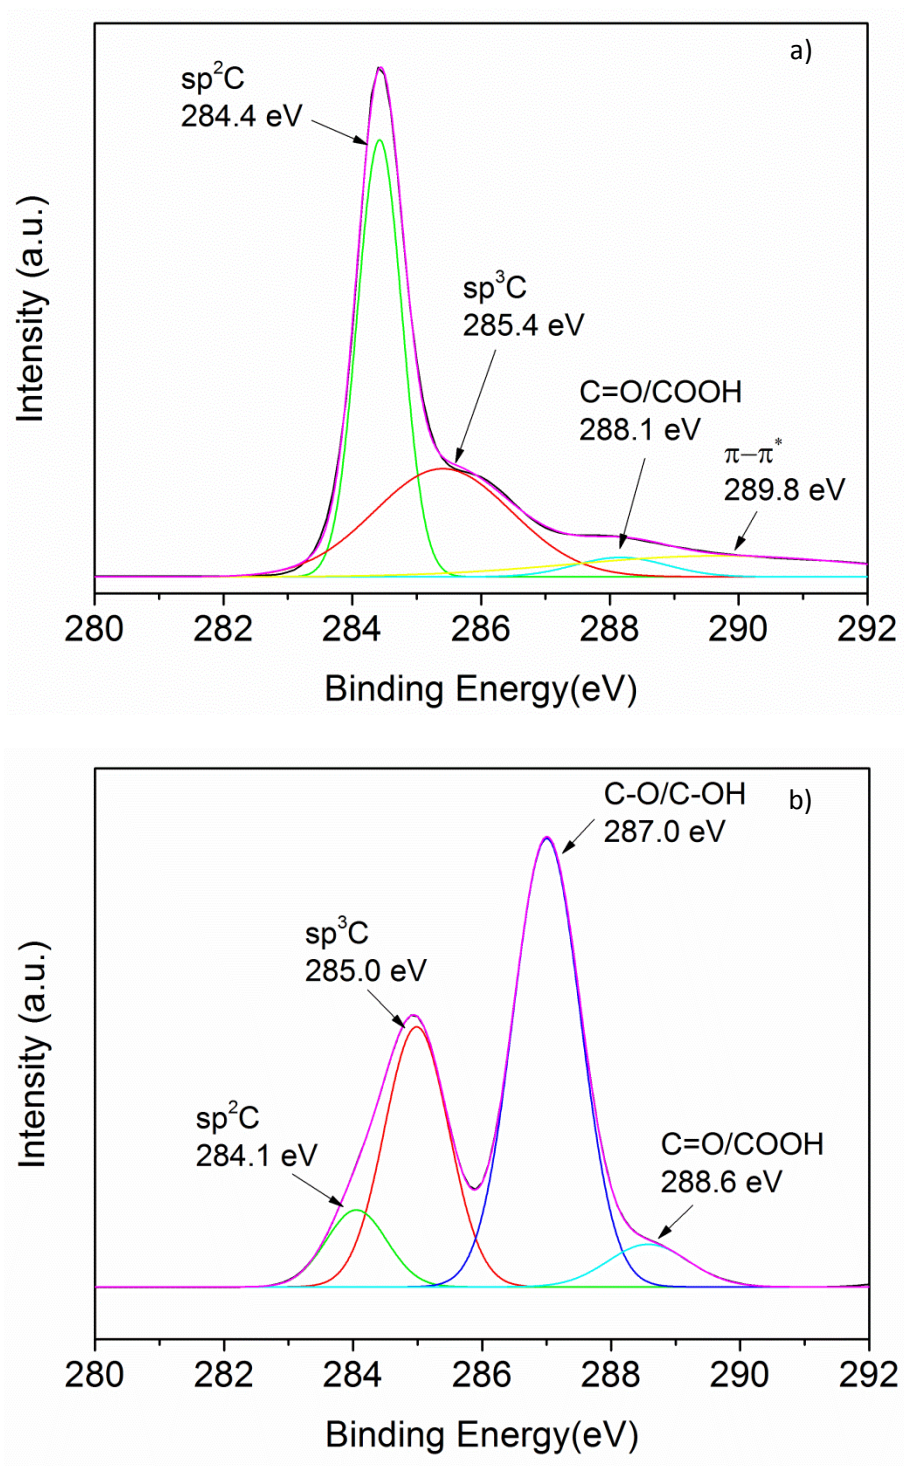

**Fig. S3** Curve-fitting of C1s XPS spectra of a) 3DGO and b) 2DGO

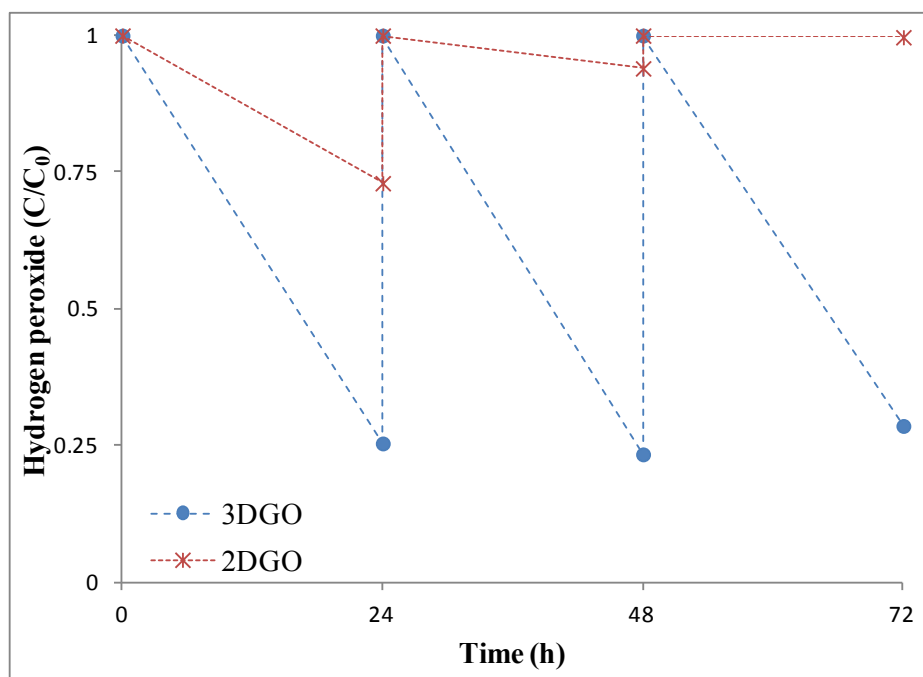

**Fig. S4** Determination of hydrogen peroxide amounts during the catalytic reactions, both for 2D and 3DGO. For the determination of  $\text{H}_2\text{O}_2$ , aliquots of each reaction were dissolved in dilute sulphuric acid cooled with ice and  $\text{H}_2\text{O}_2$  was titrated against 0.1 N ceric sulfate solution, using ferroin as indicator [1].

**Table S1** Results of XPS analysis of the C1s content on the 3DGO and 2DGO

| Chemical<br>Bonds [2]                              | 3DGO    |           | 2DGO    |           |
|----------------------------------------------------|---------|-----------|---------|-----------|
|                                                    | BE (eV) | AC (at.%) | BE (eV) | AC (at.%) |
| sp <sup>2</sup> C                                  | 284.4   | 46.1      | 284.1   | 8.44      |
| sp <sup>3</sup> C                                  | 285.3   | 35.0      | 285.0   | 30.45     |
| C-O/C-OH                                           | <0.1    | <0.1      | 287     | 54.89     |
| C=O/COOH                                           | 288.1   | 4.23      | 288.6   | 6.22      |
| $\pi$ - $\pi^*$ [3]                                | 289.7   | 14.68     | -       | -         |
| <b>Ratio</b><br>sp <sup>2</sup> /sp <sup>3</sup> C | 1.32    |           | 0.28    |           |
| <b>Ratio</b><br>C/O                                | 2.10    |           | 0.75    |           |

## References

- [1] A. I. Vogel, A Text-Book of Quantitative Inorganic Analysis Including Elementary Instrumental Analysis, 3<sup>rd</sup> edn., Longman, London, 1961, p. 325.
- [2] Z.J. Fan, W. Kai, J. Yan, T. Wei, L.J. Zhi, J. Feng et al. Facile synthesis of graphene nanosheets via Fe reduction of exfoliated graphite oxide ACS Nano, 5 (2011), pp. 191-198.
- [3] A. V. Murugan, T. Muraliganth and A. Manthiram, *Chem. Mater.*, 2009, **21**, 5004
